# Supplementary material for: Whole-exome sequencing identifies two novel mutations in KCNQ4 in individuals with nonsyndromic hearing loss
Source: PubMed Central journal article supplement (PMC6226507; doi:10.1038/s41598-018-34876-9), 2018-11-09
Supplement: 41598_2018_34876_MOESM1_ESM.pdf [file 41598_2018_34876_MOESM1_ESM.pdf]

# Supplementary Information

Whole-exome sequencing identifies two novel mutations in *KCNQ4* in individuals with nonsyndromic hearing loss

Jinsei Jung, Hyun Been Choi, Young Ik Koh, John Hoon Rim, Hye Ji Choi, Sung Huhn Kim, Jae Hyun Lee, Jieun An, Ami Kim, Joon Suk Lee, Sun Young Joo, Seyoung Yu, Jae Young Choi, Tong Mook Kang, Heon Yung Gee

**Table S1. Pathogenic or likely pathogenic *KCNQ4* variants linked to DFNA2.**

| <b>Nucleotide change</b> | <b>Amino acid change</b> | <b>HG-MD</b> | <b>ClinVar</b>    | <b>Reference</b>                                                   |
|--------------------------|--------------------------|--------------|-------------------|--------------------------------------------------------------------|
| c.211del                 | p.Q71Sfs*68              | O            | Pathogenic        | Kamada (2006) J Hum Genet 51: 455 PubMed: 16596322                 |
| c.212_224del             | p.Q71Pfs*64              | O            |                   | Coucke (1999) Hum Mol Genet 8: 1321 PubMed: 10369879               |
| c.228_229dup             | p.H77Rfs*63              | O            | Pathogenic        | Naito (2013) PLoS One 8: e63231 PubMed: 23717403                   |
| c.459del                 | p.A154Pfs*85             |              | Pathogenic        |                                                                    |
| c.463G>A                 | p.G155R                  | O            |                   | Iwasa (2016) PLoS One 11: e0166781 PubMed: 27911912                |
| c.546C>G                 | p.F182L                  | O            | Pathogenic        | Su (2007) Audiol Neurootol 12: 20 PubMed: 17033161                 |
| c.648C>T                 | synonymous               | O            |                   | Su (2007) Audiol Neurootol 12: 20 PubMed: 17033161                 |
| c.650T>A                 | p.M217K                  | O            |                   | Sloan-Heggen (2016) Hum Genet 135: 441 PubMed: 26969326            |
| c.667_684del             | p.T223_G228del           | O            |                   | Baek (2010) Biochim Biophys Acta 1812: 536 PubMed: 20832469        |
| c.689T>A                 | p.Val230Glu              | O            | Pathogenic        | Naito (2013) PLoS One 8: e63231 PubMed: 23717403                   |
| c.701A>T                 | p.H234L                  | O            |                   | Uehara (2015) Hum Genome Var 2: 15038 PubMed: 27081546             |
| c.701A>G                 | p.His234Arg              |              | Likely pathogenic | Hildebrand (2008) Genet Med 10: 797 PubMed: 18941426               |
| c.725G>A                 | p.W242*                  | O            |                   | Iwasa (2016) PLoS One 11: e0166781 PubMed: 27911912                |
| c.754G>C                 | p.A252P                  | O            |                   | Hildebrand (2008) Genet Med 10: 797 PubMed: 18941426               |
| c.778G>A                 | p.Glu260Lys              | O            | Pathogenic        | Hildebrand (2008) Genet Med 10: 797 PubMed: 18941426               |
| c.785A>T                 | p.Asp262Val              | O            | Pathogenic        | Watabe (2013) Biochem Biophys Res Commun 432: 475 PubMed: 23399560 |
| c.806_808delCCT          | p.Ser269del              | O            | Likely pathogenic | Namba (2012) BMC Res Notes 5: 145 PubMed: 22420747                 |
| c.808T>C                 | p.Tyr270His              | O            | Pathogenic        | van Hauwe (2000) Am J Med Genet 93: 184 PubMed: 10925378           |
| c.821T>A                 | p.Leu274His              | O            | Pathogenic        | Wang (2014) PLoS One 9: e103133 PubMed: 25116015                   |
| c.823T>C                 | p.Trp275Arg              | O            | Pathogenic        | Hildebrand (2008) Genet Med 10: 797 PubMed: 18941426               |
| c.824G>C                 | p.Trp275Ser              |              | Likely pathogenic |                                                                    |

|                |              |   |                   |                                                                        |
|----------------|--------------|---|-------------------|------------------------------------------------------------------------|
| c.827G>C       | p.Trp276Ser  | O | Pathogenic        | Coucke (1999) Hum Mol Genet 8: 1321 PubMed: 10369879                   |
| c.827G>T       | p.W276L      | O |                   | Sommen (2016) Hum Mutat 37: 812 PubMed: 27068579                       |
| c.842T>C       | p.Leu281Ser  | O | Pathogenic        | Talebizadeh (1999) Hum Mutat 14: 493 PubMed: 10571947                  |
| c.853G>A       | p.Gly285Ser  | O | Likely pathogenic | Kubisch (1999) Cell 96: 437 PubMed: 10025409                           |
| c.853G>T       | p.Gly285Cys  | O | Pathogenic        | Coucke (1999) Hum Mol Genet 8: 1321 PubMed: 10369879                   |
| c.857A>G       | p.Y286C      | O |                   | Sloan-Heggen (2016) Hum Genet 135: 441 PubMed: 26969326                |
| c.859G>C       | p.G287R      | O |                   | Arnett (2011) Arch Otolaryngol Head Neck Surg 137: 54 PubMed: 21242547 |
| c.871C>T       | p.Pro291Ser  | O | Pathogenic        | Naito (2013) PLoS One 8: e63231 PubMed: 23717403                       |
| c.872C>T       | p.Pro291Leu  | O | Pathogenic        | Naito (2013) PLoS One 8: e63231 PubMed: 23717403                       |
| c.886G>A       | p.Gly296Ser  | O | Pathogenic        | Mencía (2008) Hum Genet 123: 41 PubMed: 18030493                       |
| c.887G>A       | p.G296D      | O |                   | Huang (2017) BMC Med Genet 18: 36 PubMed: 28340560                     |
| c.891G>T       | p.Arg297Ser  | O | Pathogenic        | Naito (2013) PLoS One 8: e63231 PubMed: 23717403                       |
| c.961G>A       | p.Gly321Ser  | O | Pathogenic        | Coucke (1999) Hum Mol Genet 8: 1321 PubMed: 10369879                   |
| c.1044_1051del | p.A349Pfs*19 | O | Pathogenic        | Wasano (2015) Biochem Biophys Res Commun 463: 582 PubMed: 26036578     |
| c.1667_1671dup | p.V558Tfs*3  |   | Likely pathogenic |                                                                        |
| c.1725del      | p.I576Sfs*40 | O |                   | Johnston (2015) Am J Hum Genet 96: 913 PubMed: 26046366                |
| c.2014G>A      | p.V672M      | O |                   | Miyagawa (2013) PLoS One 8: e71381 PubMed: 23967202                    |
| c.2039C>T      | p.Ser680Phe  | O | Pathogenic        | Wu (2013) PLoS One 8: e57369 PubMed: 23451214                          |

**Table S2. 144 monogenic genes linked to hearing loss if mutated.**

| <b>Gene Symbol</b>   | <b>MIM number</b> | <b>Associated phenotypes and MIM number</b>                                                                                                                                                                                                                                                                                                                        |
|----------------------|-------------------|--------------------------------------------------------------------------------------------------------------------------------------------------------------------------------------------------------------------------------------------------------------------------------------------------------------------------------------------------------------------|
| <i>ESPN</i>          | 606351            | <b>Deafness, autosomal recessive 36</b> , 609006, Autosomal recessive; <b>Deafness</b> , neurosensory, without vestibular involvement, autosomal dominant                                                                                                                                                                                                          |
| <i>GJB3</i>          | 603324            | <b>Deafness, autosomal dominant 2B</b> , 612644, Autosomal dominant; <b>Deafness</b> , autosomal dominant, with peripheral neuropathy; <b>Deafness</b> , autosomal recessive; <b>Deafness</b> , digenic, GJB2/GJB3, 220290, Autosomal recessive, Digenic dominant; Erythrokeratoderma variabilis et progressiva 1, 133200, Autosomal recessive, Autosomal dominant |
| <i>COL9A2</i>        | 120260            | Epiphyseal dysplasia, multiple, 2, 600204, Autosomal dominant; <b>Stickler syndrome, type V</b> , 614284, Autosomal recessive                                                                                                                                                                                                                                      |
| <i>KCNQ4</i>         | 603537            | <b>Deafness, autosomal dominant 2A</b> , 600101, Autosomal dominant                                                                                                                                                                                                                                                                                                |
| <i>BSND</i>          | 606412            | <b>Barter syndrome, type 4a</b> , 602522, Autosomal recessive; <b>Sensorineural Deafness</b> with mild renal dysfunction, 602522, Autosomal recessive                                                                                                                                                                                                              |
| <i>COL11A1</i>       | 120280            | <b>Fibrochondrogenesis 1</b> , 228520, Autosomal recessive; {Lumbar disc herniation, susceptibility to}, 603932; <b>Marshall syndrome</b> , 154780, Autosomal dominant; <b>Stickler syndrome, type II</b> , 604841, Autosomal dominant                                                                                                                             |
| <i>GPSM2</i>         | 609245            | <b>Chudley-McCullough syndrome</b> , 604213, Autosomal recessive                                                                                                                                                                                                                                                                                                   |
| <i>KCNJ10</i>        | 602208            | <b>Enlarged vestibular aqueduct, digenic</b> , 600791, Autosomal recessive; <b>SESAME syndrome</b> , 612780, Autosomal recessive                                                                                                                                                                                                                                   |
| <i>USH2A</i>         | 608400            | Retinitis pigmentosa 39, 613809; <b>Usher syndrome, type 2A</b> , 276901, Autosomal recessive                                                                                                                                                                                                                                                                      |
| <i>OTOF</i>          | 603681            | Auditory neuropathy, autosomal recessive, 1, 601071, Autosomal recessive; <b>Deafness, autosomal recessive 9</b> , 601071, Autosomal recessive                                                                                                                                                                                                                     |
| <i>PNPT1</i>         | 610316            | Combined oxidative phosphorylation deficiency 13, 614932, Autosomal recessive; <b>Deafness, autosomal recessive 70</b> , 614934, Autosomal recessive                                                                                                                                                                                                               |
| <i>ELMOD3</i>        | 615427            | <b>Deafness, autosomal recessive 88</b> , 615429, Autosomal recessive                                                                                                                                                                                                                                                                                              |
| <i>DFNB59 (PJKV)</i> | 610219            | <b>Deafness, autosomal recessive 59</b> , 610220, Autosomal recessive                                                                                                                                                                                                                                                                                              |
| <i>PAX3</i>          | 606597            | Craniofacial- <b>Deafness</b> -hand syndrome, 122880, Autosomal dominant; Rhabdomyosarcoma 2, alveolar, 268220, Autosomal recessive; <b>Waardenburg syndrome, type 1</b> , 193500, Autosomal dominant; <b>Waardenburg syndrome, type 3</b> , 148820, Autosomal recessive, Autosomal dominant                                                                       |
| <i>COL4A4</i>        | 120131            | <b>Alport syndrome</b> , autosomal recessive, 203780, Autosomal recessive; Hematuria, familial benign                                                                                                                                                                                                                                                              |
| <i>COL4A3</i>        | 120070            | <b>Alport syndrome</b> , autosomal dominant, 104200, Autosomal dominant; Alport syndrome, autosomal recessive, 203780, Autosomal recessive; Hematuria, benign familial, 141200, Autosomal dominant                                                                                                                                                                 |
| <i>LARS2</i>         | 604544            | ?Hydrops, lactic acidosis, and sideroblastic anemia, 617021, Autosomal recessive; <b>Perrault syndrome 4</b> , 615300, Autosomal recessive                                                                                                                                                                                                                         |
| <i>TMIE</i>          | 607237            | <b>Deafness, autosomal recessive 6</b> , 600971, Autosomal recessive                                                                                                                                                                                                                                                                                               |
| <i>MITF</i>          | 156845            | COMMAD syndrome, 617306, Autosomal recessive; {Melanoma, cutaneous malignant, susceptibility to, 8}, 614456; Tietz albinism- <b>Deafness</b> syndrome, 103500, Autosomal dominant; Waardenburg syndrome, type 2A, 193510, Autosomal dominant; Waardenburg syndrome/ocular albinism, digenic, 103470, Autosomal dominant                                            |
| <i>ILDR1</i>         | 609739            | <b>Deafness, autosomal recessive 42</b> , 609646, Autosomal recessive                                                                                                                                                                                                                                                                                              |
| <i>CLRN1</i>         | 606397            | Retinitis pigmentosa 61, 614180; Usher syndrome, type 3A, 276902, Autosomal recessive                                                                                                                                                                                                                                                                              |
| <i>CCDC50</i>        | 611051            | ? <b>Deafness, autosomal dominant 44</b> , 607453, Autosomal dominant                                                                                                                                                                                                                                                                                              |
| <i>WFS1</i>          | 606201            | ?Cataract 41, 116400, Autosomal dominant; <b>Deafness</b> , autosomal dominant 6/14/38, 600965, Autosomal dominant;                                                                                                                                                                                                                                                |

|                 |        |                                                                                                                                                                                                                                                                                                                                                                                              |
|-----------------|--------|----------------------------------------------------------------------------------------------------------------------------------------------------------------------------------------------------------------------------------------------------------------------------------------------------------------------------------------------------------------------------------------------|
|                 |        | {Diabetes mellitus, noninsulin-dependent, association with}, 125853, Autosomal dominant; Wolfram syndrome 1, 222300, Autosomal recessive; Wolfram-like syndrome, autosomal dominant, 614296, Autosomal dominant                                                                                                                                                                              |
| <i>GRXCR1</i>   | 613283 | <b>Deafness, autosomal recessive 25</b> , 613285, Autosomal recessive                                                                                                                                                                                                                                                                                                                        |
| <i>DSPP</i>     | 125485 | <b>Deafness, autosomal dominant 39</b> , with dentinogenesis, 605594, Autosomal dominant; Dentin dysplasia, type II, 125420, Autosomal dominant; Dentinogenesis imperfecta, Shields type II, 125490, Autosomal dominant; Dentinogenesis imperfecta, Shields type III, 125500, Autosomal dominant                                                                                             |
| <i>MARVELD2</i> | 610572 | <b>Deafness, autosomal recessive 49</b> , 610153, Autosomal recessive                                                                                                                                                                                                                                                                                                                        |
| <i>ADGRV1</i>   | 602851 | ?Febrile seizures, familial, 4, 604352, Autosomal dominant; Usher syndrome, type 2C, 605472, Autosomal recessive, Digenic dominant; Usher syndrome, type 2C, GPR98/PDZD7 digenic, 605472, Autosomal recessive, Digenic dominant                                                                                                                                                              |
| <i>HSD17B4</i>  | 601860 | D-bifunctional protein deficiency, 261515, Autosomal recessive; Perrault syndrome 1, 233400, Autosomal recessive                                                                                                                                                                                                                                                                             |
| <i>HARS2</i>    | 600783 | ?Perrault syndrome 2, 614926, Autosomal recessive                                                                                                                                                                                                                                                                                                                                            |
| <i>DIAPH1</i>   | 602121 | <b>Deafness, autosomal dominant 1</b> , 124900, Autosomal dominant; Seizures, cortical blindness, microcephaly syndrome, 616632, Autosomal recessive                                                                                                                                                                                                                                         |
| <i>GRXCR2</i>   | 615762 | ? <b>Deafness, autosomal recessive 101</b> , 615837, Autosomal recessive                                                                                                                                                                                                                                                                                                                     |
| <i>POU4F3</i>   | 602460 | <b>Deafness, autosomal dominant 15</b> , 602459, Autosomal dominant                                                                                                                                                                                                                                                                                                                          |
| <i>TCOF1</i>    | 606847 | Treacher Collins syndrome 1, 154500, Autosomal dominant                                                                                                                                                                                                                                                                                                                                      |
| <i>FOXI1</i>    | 601093 | Enlarged vestibular aqueduct, 600791, Autosomal recessive                                                                                                                                                                                                                                                                                                                                    |
| <i>SERPINB6</i> | 173321 | ? <b>Deafness, autosomal recessive 91</b> , 613453, Autosomal recessive                                                                                                                                                                                                                                                                                                                      |
| <i>DCDC2</i>    | 605755 | ? <b>Deafness, autosomal recessive 66</b> , 610212, Autosomal recessive; Nephronophthisis 19, 616217, Autosomal recessive; Sclerosing cholangitis, neonatal, 617394, Autosomal recessive                                                                                                                                                                                                     |
| <i>RIPOR2</i>   | 611410 | ? <b>Deafness, autosomal recessive 104</b> , 616515, Autosomal recessive                                                                                                                                                                                                                                                                                                                     |
| <i>COL11A2</i>  | 120290 | <b>Deafness, autosomal dominant 13</b> , 601868, Autosomal dominant; <b>Deafness, autosomal recessive 53</b> , 609706, Autosomal recessive; Fibrochondrogenesis 2, 614524, Autosomal recessive, Autosomal dominant; Otospondylomegapiphyseal dysplasia, autosomal dominant, 184840, Autosomal dominant; Otospondylomegapiphyseal dysplasia, autosomal recessive, 215150, Autosomal recessive |
| <i>LHFPL5</i>   | 609427 | <b>Deafness, autosomal recessive 67</b> , 610265, Autosomal recessive                                                                                                                                                                                                                                                                                                                        |
| <i>POLR1C</i>   | 610060 | Leukodystrophy, hypomyelinating, 11, 616494, Autosomal recessive; Treacher Collins syndrome 3, 248390, Autosomal recessive                                                                                                                                                                                                                                                                   |
| <i>CLIC5</i>    | 607293 | ? <b>Deafness, autosomal recessive 103</b> , 616042, Autosomal recessive                                                                                                                                                                                                                                                                                                                     |
| <i>COL9A1</i>   | 120210 | ?Epiphyseal dysplasia, multiple, 6, 614135, Autosomal dominant; Stickler syndrome, type IV, 614134                                                                                                                                                                                                                                                                                           |
| <i>MYO6</i>     | 600970 | <b>Deafness, autosomal dominant 22</b> , 606346, Autosomal dominant; <b>Deafness, autosomal dominant 22</b> , with hypertrophic cardiomyopathy, 606346, Autosomal dominant; <b>Deafness, autosomal recessive 37</b> , 607821, Autosomal recessive                                                                                                                                            |
| <i>EYA4</i>     | 603550 | Cardiomyopathy, dilated, 1J, 605362; <b>Deafness, autosomal dominant 10</b> , 601316, Autosomal dominant                                                                                                                                                                                                                                                                                     |
| <i>GSDME</i>    | 608798 | <b>Deafness, autosomal dominant 5</b> , 600994, Autosomal dominant                                                                                                                                                                                                                                                                                                                           |
| <i>ADCY1</i>    | 103072 | ? <b>Deafness, autosomal recessive 44</b> , 610154, Autosomal recessive                                                                                                                                                                                                                                                                                                                      |
| <i>HGF</i>      | 142409 | <b>Deafness, autosomal recessive 39</b> , 608265, Autosomal recessive                                                                                                                                                                                                                                                                                                                        |
| <i>SEMA3E</i>   | 608166 | ?CHARGE syndrome, 214800, Autosomal dominant                                                                                                                                                                                                                                                                                                                                                 |
| <i>SLC26A5</i>  | 604943 | ? <b>Deafness, autosomal recessive 61</b> , 613865, Autosomal recessive                                                                                                                                                                                                                                                                                                                      |
| <i>SLC26A4</i>  | 605646 | <b>Deafness, autosomal recessive 4</b> , with enlarged vestibular aqueduct, 600791, Autosomal recessive; Pendred                                                                                                                                                                                                                                                                             |

|               |        |                                                                                                                                                                                                                                                                                                               |
|---------------|--------|---------------------------------------------------------------------------------------------------------------------------------------------------------------------------------------------------------------------------------------------------------------------------------------------------------------|
|               |        | syndrome, 274600, Autosomal recessive                                                                                                                                                                                                                                                                         |
| <i>MET</i>    | 164860 | ? <b>Deafness, autosomal recessive 97</b> , 616705, Autosomal recessive; Hepatocellular carcinoma, childhood type, somatic, 114550; {Osteofibrous dysplasia, susceptibility to}, 607278, Autosomal dominant; Renal cell carcinoma, papillary, 1, familial and somatic, 605074                                 |
| <i>MIR96</i>  | 611606 | <b>Deafness, autosomal dominant 50</b> , 613074, Autosomal dominant                                                                                                                                                                                                                                           |
| <i>SNAI2</i>  | 602150 | Piebaldism, 172800, Autosomal dominant; Waardenburg syndrome, type 2D, 608890, Autosomal recessive                                                                                                                                                                                                            |
| <i>CHD7</i>   | 608892 | CHARGE syndrome, 214800, Autosomal dominant; Hypogonadotropic hypogonadism 5 with or without anosmia, 612370, Autosomal dominant                                                                                                                                                                              |
| <i>EYA1</i>   | 601653 | Anterior segment anomalies with or without cataract, 602588, Autosomal dominant; Branchiootic syndrome 1, 602588, Autosomal dominant; Branchiootorenal syndrome 1, with or without cataracts, 113650, Autosomal dominant; ?Otofaciocervical syndrome, 166780, Autosomal dominant                              |
| <i>GRHL2</i>  | 608576 | <b>Deafness, autosomal dominant 28</b> , 608641, Autosomal dominant; Ectodermal dysplasia/short stature syndrome, 616029, Autosomal recessive                                                                                                                                                                 |
| <i>MTAP</i>   | 156540 | Diaphyseal medullary stenosis with malignant fibrous histiocytoma, 112250, Autosomal dominant                                                                                                                                                                                                                 |
| <i>TJP2</i>   | 607709 | Cholestasis, progressive familial intrahepatic 4, 615878, Autosomal recessive; Hypercholanemia, familial, 607748                                                                                                                                                                                              |
| <i>TMC1</i>   | 606706 | <b>Deafness, autosomal dominant 36</b> , 606705, Autosomal dominant; <b>Deafness</b> , autosomal recessive 7, 600974, Autosomal recessive                                                                                                                                                                     |
| <i>WHRN</i>   | 607928 | <b>Deafness, autosomal recessive 31</b> , 607084, Autosomal recessive; Usher syndrome, type 2D, 611383, Autosomal recessive                                                                                                                                                                                   |
| <i>TNC</i>    | 187380 | <b>Deafness, autosomal dominant 56</b> , 615629, Autosomal dominant                                                                                                                                                                                                                                           |
| <i>TPRN</i>   | 613354 | <b>Deafness, autosomal recessive 79</b> , 613307, Autosomal recessive                                                                                                                                                                                                                                         |
| <i>MYO3A</i>  | 606808 | <b>Deafness, autosomal recessive 30</b> , 607101, Autosomal recessive                                                                                                                                                                                                                                         |
| <i>PCDH15</i> | 605514 | <b>Deafness, autosomal recessive 23</b> , 609533, Autosomal recessive; Usher syndrome, type 1D/F digenic, 601067, Autosomal recessive, Digenic recessive; Usher syndrome, type 1F, 602083, Autosomal recessive                                                                                                |
| <i>CDH23</i>  | 605516 | <b>Deafness, autosomal recessive 12</b> , 601386, Autosomal recessive; {Pituitary adenoma 5, multiple types}, 617540, Autosomal dominant; Usher syndrome, type 1D, 601067, Autosomal recessive, Digenic recessive; Usher syndrome, type 1D/F digenic, 601067, Autosomal recessive, Digenic recessive          |
| <i>PDZD7</i>  | 612971 | {Retinal disease in Usher syndrome type IIA, modifier of}, 276901, Autosomal recessive; Usher syndrome, type IIC, GPR98/PDZD7 digenic, 605472, Autosomal recessive, Digenic dominant                                                                                                                          |
| <i>KCNQ1</i>  | 607542 | Atrial fibrillation, familial, 3, 607554, Autosomal dominant; Jervell and Lange-Nielsen syndrome, 220400, Autosomal recessive; Long QT syndrome 1, 192500, Autosomal dominant; {Long QT syndrome 1, acquired, susceptibility to}, 192500, Autosomal dominant; Short QT syndrome 2, 609621, Autosomal dominant |
| <i>USH1C</i>  | 605242 | <b>Deafness, autosomal recessive 18A</b> , 602092, Autosomal recessive; Usher syndrome, type 1C, 276904, Autosomal recessive                                                                                                                                                                                  |
| <i>OTOG</i>   | 604487 | <b>Deafness, autosomal recessive 18B</b> , 614945, Autosomal recessive                                                                                                                                                                                                                                        |
| <i>CABP2</i>  | 607314 | <b>Deafness, autosomal recessive 93</b> , 614899, Autosomal recessive                                                                                                                                                                                                                                         |
| <i>LRTOMT</i> | 612414 | <b>Deafness, autosomal recessive 63</b> , 611451, Autosomal recessive                                                                                                                                                                                                                                         |
| <i>MYO7A</i>  | 276903 | <b>Deafness, autosomal dominant 11</b> , 601317, Autosomal dominant; <b>Deafness</b> , autosomal recessive 2, 600060, Autosomal recessive; Usher syndrome, type 1B, 276900, Autosomal recessive                                                                                                               |
| <i>NARS2</i>  | 612803 | Combined oxidative phosphorylation deficiency 24, 616239, Autosomal recessive                                                                                                                                                                                                                                 |

|                |        |                                                                                                                                                                                                                                                                                                                                                                                                                                                                                                                                                                                                                                                                                                                                                                                                                                                                                                                                                                               |
|----------------|--------|-------------------------------------------------------------------------------------------------------------------------------------------------------------------------------------------------------------------------------------------------------------------------------------------------------------------------------------------------------------------------------------------------------------------------------------------------------------------------------------------------------------------------------------------------------------------------------------------------------------------------------------------------------------------------------------------------------------------------------------------------------------------------------------------------------------------------------------------------------------------------------------------------------------------------------------------------------------------------------|
| <i>RDX</i>     | 179410 | <b>Deafness, autosomal recessive 24</b> , 611022, Autosomal recessive                                                                                                                                                                                                                                                                                                                                                                                                                                                                                                                                                                                                                                                                                                                                                                                                                                                                                                         |
| <i>TECTA</i>   | 602574 | <b>Deafness, autosomal dominant 8/12</b> , 601543, Autosomal dominant; <b>Deafness, autosomal recessive 21</b> , 603629, Autosomal recessive                                                                                                                                                                                                                                                                                                                                                                                                                                                                                                                                                                                                                                                                                                                                                                                                                                  |
| <i>EPS8</i>    | 600206 | ? <b>Deafness, autosomal recessive 102</b> , 615974, Autosomal recessive                                                                                                                                                                                                                                                                                                                                                                                                                                                                                                                                                                                                                                                                                                                                                                                                                                                                                                      |
| <i>COL2A1</i>  | 120140 | Achondrogenesis, type II or hypochondrogenesis, 200610, Autosomal dominant; Avascular necrosis of the femoral head, 608805, Autosomal dominant; Czech dysplasia, 609162, Autosomal dominant; Epiphyseal dysplasia, multiple, with myopia and <b>Deafness</b> , 132450, Autosomal dominant; Kniest dysplasia, 156550, Autosomal dominant; Legg-Calve-Perthes disease, 150600, Autosomal dominant; Osteoarthritis with mild chondrodysplasia, 604864, Autosomal dominant; Platypondylic skeletal dysplasia, Torrance type, 151210, Autosomal dominant; SED congenita, 183900, Autosomal dominant; SMED Strudwick type, 184250, Autosomal dominant; Spondyloepiphyseal dysplasia, Stanescu type, 616583, Autosomal dominant; Spondyloperipheral dysplasia, 271700, Autosomal dominant; Stickler syndrome, type I, nonsyndromic ocular, 609508, Autosomal dominant; Stickler syndrome, type I, 108300, Autosomal dominant; Vitreoretinopathy with phalangeal epiphyseal dysplasia |
| <i>MYO1A</i>   | 601478 | Previously known as Deafness, AUTOSOMAL DOMINANT 48, but reclassified                                                                                                                                                                                                                                                                                                                                                                                                                                                                                                                                                                                                                                                                                                                                                                                                                                                                                                         |
| <i>MSRB3</i>   | 613719 | <b>Deafness, autosomal recessive 74</b> , 613718, Autosomal recessive                                                                                                                                                                                                                                                                                                                                                                                                                                                                                                                                                                                                                                                                                                                                                                                                                                                                                                         |
| <i>OTOGL</i>   | 614925 | <b>Deafness, autosomal recessive 84B</b> , 614944, Autosomal recessive                                                                                                                                                                                                                                                                                                                                                                                                                                                                                                                                                                                                                                                                                                                                                                                                                                                                                                        |
| <i>PTPRQ</i>   | 603317 | <b>Deafness, autosomal dominant 73</b> , 617663, Autosomal dominant; <b>Deafness, autosomal recessive 84A</b> , 613391, Autosomal recessive                                                                                                                                                                                                                                                                                                                                                                                                                                                                                                                                                                                                                                                                                                                                                                                                                                   |
| <i>SLC17A8</i> | 607557 | <b>Deafness, autosomal dominant 25</b> , 605583, Autosomal dominant                                                                                                                                                                                                                                                                                                                                                                                                                                                                                                                                                                                                                                                                                                                                                                                                                                                                                                           |
| <i>DIABLO</i>  | 605219 | <b>Deafness, autosomal dominant 64</b> , 614152, Autosomal dominant                                                                                                                                                                                                                                                                                                                                                                                                                                                                                                                                                                                                                                                                                                                                                                                                                                                                                                           |
| <i>P2RX2</i>   | 600844 | <b>Deafness, autosomal dominant 41</b> , 608224, Autosomal dominant                                                                                                                                                                                                                                                                                                                                                                                                                                                                                                                                                                                                                                                                                                                                                                                                                                                                                                           |
| <i>GJB2</i>    | 121011 | Bart-Pumphrey syndrome, 149200, Autosomal dominant; <b>Deafness, autosomal dominant 3A</b> , 601544, Autosomal dominant; <b>Deafness, autosomal recessive 1A</b> , 220290, Autosomal recessive, Digenic dominant; Hystrix-like ichthyosis with <b>Deafness</b> , 602540, Autosomal dominant; Keratitis-ichthyosis- <b>Deafness</b> syndrome, 148210, Autosomal dominant; Keratoderma, palmoplantar, with <b>Deafness</b> , 148350, Autosomal dominant; Vohwinkel syndrome, 124500, Autosomal dominant                                                                                                                                                                                                                                                                                                                                                                                                                                                                         |
| <i>GJB6</i>    | 604418 | <b>Deafness, autosomal dominant 3B</b> , 612643, Autosomal dominant; <b>Deafness, autosomal recessive 1B</b> , 612645, Autosomal recessive; <b>Deafness</b> , digenic GJB2/GJB6, 220290, Autosomal recessive, Digenic dominant; Ectodermal dysplasia 2, Clouston type, 129500, Autosomal dominant                                                                                                                                                                                                                                                                                                                                                                                                                                                                                                                                                                                                                                                                             |
| <i>POLR1D</i>  | 613715 | <b>Treacher Collins syndrome 2</b> , 613717, Autosomal recessive, Autosomal dominant                                                                                                                                                                                                                                                                                                                                                                                                                                                                                                                                                                                                                                                                                                                                                                                                                                                                                          |
| <i>DIAPH3</i>  | 614567 | <b>Auditory neuropathy</b> , autosomal dominant, 1, 609129, Autosomal dominant                                                                                                                                                                                                                                                                                                                                                                                                                                                                                                                                                                                                                                                                                                                                                                                                                                                                                                |
| <i>EDNRB</i>   | 131244 | <b>ABCD syndrome</b> , 600501, Autosomal recessive; {Hirschsprung disease, susceptibility to, 2}, 600155, Autosomal dominant; <b>Waardenburg syndrome, type 4A</b> , 277580, Autosomal recessive, Autosomal dominant                                                                                                                                                                                                                                                                                                                                                                                                                                                                                                                                                                                                                                                                                                                                                          |
| <i>COCH</i>    | 603196 | <b>Deafness, autosomal dominant 9</b> , 601369, Autosomal dominant                                                                                                                                                                                                                                                                                                                                                                                                                                                                                                                                                                                                                                                                                                                                                                                                                                                                                                            |
| <i>SIX1</i>    | 601205 | Branchioototic syndrome 3, 608389, Autosomal dominant; <b>Deafness</b> , autosomal dominant 23, 605192, Autosomal dominant                                                                                                                                                                                                                                                                                                                                                                                                                                                                                                                                                                                                                                                                                                                                                                                                                                                    |
| <i>ESRRB</i>   | 602167 | <b>Deafness, autosomal recessive 35</b> , 608565, Autosomal recessive                                                                                                                                                                                                                                                                                                                                                                                                                                                                                                                                                                                                                                                                                                                                                                                                                                                                                                         |
| <i>STRC</i>    | 606440 | <b>Deafness, autosomal recessive 16</b> , 603720, Autosomal recessive                                                                                                                                                                                                                                                                                                                                                                                                                                                                                                                                                                                                                                                                                                                                                                                                                                                                                                         |
| <i>CIB2</i>    | 605564 | <b>Deafness, autosomal recessive 48</b> , 609439, Autosomal recessive; Usher syndrome, type IJ, 614869, Autosomal recessive                                                                                                                                                                                                                                                                                                                                                                                                                                                                                                                                                                                                                                                                                                                                                                                                                                                   |

|                 |        |                                                                                                                                                                                                                                                                                                                                                                     |
|-----------------|--------|---------------------------------------------------------------------------------------------------------------------------------------------------------------------------------------------------------------------------------------------------------------------------------------------------------------------------------------------------------------------|
| <i>HOMER2</i>   | 604799 | ? <b>Deafness, autosomal dominant 68</b> , 616707, Autosomal dominant                                                                                                                                                                                                                                                                                               |
| <i>TBC1D24</i>  | 613577 | DOORS syndrome, 220500, Autosomal recessive; <b>Deafness , autosomal recessive 86</b> , 614617, Autosomal recessive; <b>Deafness, autosomal dominant 65</b> , 616044, Autosomal dominant; Epileptic encephalopathy, early infantile, 16, 615338, Autosomal recessive; Myoclonic epilepsy, infantile, familial, 605021, Autosomal recessive                          |
| <i>CRYM</i>     | 123740 | <b>Deafness, autosomal dominant 40</b> , 616357, Autosomal dominant                                                                                                                                                                                                                                                                                                 |
| <i>OTOA</i>     | 607038 | <b>Deafness, autosomal recessive 22</b> , 607039, Autosomal recessive                                                                                                                                                                                                                                                                                               |
| <i>KARS</i>     | 601421 | ?Charcot-Marie-Tooth disease, recessive intermediate, B, 613641, Autosomal recessive; <b>Deafness, autosomal recessive 89</b> , 613916, Autosomal recessive                                                                                                                                                                                                         |
| <i>MYO15A</i>   | 602666 | <b>Deafness, autosomal recessive 3</b> , 600316, Autosomal recessive                                                                                                                                                                                                                                                                                                |
| <i>TMEM132E</i> | 616178 | Li et al. Hum Mutat. 2015;36(1):98-105                                                                                                                                                                                                                                                                                                                              |
| <i>USH1G</i>    | 607696 | <b>Usher syndrome, type 1G</b> , 606943, Autosomal recessive                                                                                                                                                                                                                                                                                                        |
| <i>ACTG1</i>    | 102560 | Baraitser-Winter syndrome 2, 614583, Autosomal dominant; <b>Deafness, autosomal dominant 20/26</b> , 604717, Autosomal dominant                                                                                                                                                                                                                                     |
| <i>LOXHD1</i>   | 613072 | <b>Deafness, autosomal recessive 77</b> , 613079, Autosomal recessive                                                                                                                                                                                                                                                                                               |
| <i>GIPC3</i>    | 608792 | <b>Deafness, autosomal recessive 15</b> , 601869, Autosomal recessive                                                                                                                                                                                                                                                                                               |
| <i>CLPP</i>     | 601119 | Perrault syndrome 3, 614129, Autosomal recessive                                                                                                                                                                                                                                                                                                                    |
| <i>S1PR2</i>    | 605111 | <b>Deafness, autosomal recessive 68</b> , 610419, Autosomal recessive                                                                                                                                                                                                                                                                                               |
| <i>SYNE4</i>    | 615535 | <b>Deafness, autosomal recessive 76</b> , 615540, Autosomal recessive                                                                                                                                                                                                                                                                                               |
| <i>CEACAM16</i> | 614591 | <b>Deafness, autosomal dominant 4B</b> , 614614, Autosomal dominant                                                                                                                                                                                                                                                                                                 |
| <i>SIX5</i>     | 600963 | <b>Branchiootorenal syndrome 2</b> , 610896                                                                                                                                                                                                                                                                                                                         |
| <i>MYH14</i>    | 608568 | <b>Deafness, autosomal dominant 4A</b> , 600652, Autosomal dominant; <b>Peripheral neuropathy, myopathy, hoarseness, and hearing loss</b> , 614369, Autosomal dominant                                                                                                                                                                                              |
| <i>EDN3</i>     | 131242 | Central hypoventilation syndrome, congenital, 209880, Autosomal dominant; {Hirschsprung disease, susceptibility to, 4}, 613712, Autosomal dominant; <b>Waardenburg syndrome, type 4B</b> , 613265, Autosomal recessive, Autosomal dominant                                                                                                                          |
| <i>OSBPL2</i>   | 606731 | <b>Deafness, autosomal dominant 67</b> , 616340, Autosomal dominant                                                                                                                                                                                                                                                                                                 |
| <i>KCNE1</i>    | 176261 | <b>Jervell and Lange-Nielsen syndrome 2</b> , 612347, Autosomal recessive; Long QT syndrome 5, 613695, Autosomal dominant                                                                                                                                                                                                                                           |
| <i>CLDN14</i>   | 605608 | <b>Deafness, autosomal recessive 29</b> , 614035, Autosomal recessive                                                                                                                                                                                                                                                                                               |
| <i>TMPRSS3</i>  | 605511 | <b>Deafness, autosomal recessive 8/10</b> , 601072, Autosomal recessive                                                                                                                                                                                                                                                                                             |
| <i>TSPEAR</i>   | 612920 | <b>Deafness, autosomal recessive 98</b> , 614861, Autosomal recessive                                                                                                                                                                                                                                                                                               |
| <i>MYH9</i>     | 160775 | <b>Deafness, autosomal dominant 17</b> , 603622, Autosomal dominant; Epstein syndrome, 153650, Autosomal dominant; Fechtner syndrome, 153640, Autosomal dominant; Macrothrombocytopenia and <b>progressive Sensorineural Deafness</b> , 600208, Autosomal dominant; May-Hegglin anomaly, 155100, Autosomal dominant; Sebastian syndrome, 605249, Autosomal dominant |
| <i>TRIOBP</i>   | 609761 | <b>Deafness, autosomal recessive 28</b> , 609823, Autosomal recessive                                                                                                                                                                                                                                                                                               |
| <i>SOX10</i>    | 602229 | <b>PCWH syndrome</b> , 609136, Autosomal dominant; <b>Waardenburg syndrome, type 2E</b> , with or without neurologic involvement, 611584, Autosomal dominant; <b>Waardenburg syndrome, type 4C</b> , 613266, Autosomal dominant                                                                                                                                     |
| <i>SMPX</i>     | 300226 | <b>Deafness, X-linked 4</b> , 300066, X-linked dominant                                                                                                                                                                                                                                                                                                             |
| <i>NDP</i>      | 300658 | Exudative vitreoretinopathy 2, X-linked, 305390; <b>Norrie disease</b> , 310600, X-linked recessive                                                                                                                                                                                                                                                                 |



|                |        |                                                                                                                                                                                                                                                                                                             |
|----------------|--------|-------------------------------------------------------------------------------------------------------------------------------------------------------------------------------------------------------------------------------------------------------------------------------------------------------------|
| <i>POU3F4</i>  | 300039 | <b>Deafness, X-linked 2</b> , 304400, X-linked recessive                                                                                                                                                                                                                                                    |
| <i>PRPS1</i>   | 311850 | Arts syndrome, 301835, X-linked recessive; Charcot-Marie-Tooth disease, X-linked recessive, 5, 311070, X-linked recessive; <b>Deafness, X-linked 1</b> , 304500, X-linked; Gout, PRPS-related, 300661, X-linked recessive; Phosphoribosylpyrophosphate synthetase superactivity, 300661, X-linked recessive |
| <i>COL4A6</i>  | 303631 | ? <b>Deafness, X-linked 6</b> , 300914, X-linked recessive                                                                                                                                                                                                                                                  |
| <i>COL4A5</i>  | 303630 | Alport syndrome, 301050, X-linked dominant                                                                                                                                                                                                                                                                  |
| <i>TMEM43</i>  | 612048 | Arrhythmogenic right ventricular dysplasia 5, 604400, Autosomal dominant; Emery-Dreifuss muscular dystrophy 7, AD, 614302, Autosomal dominant                                                                                                                                                               |
| <i>MPZL2</i>   | 604873 | Wesdorp et al. Am J Hum Genet. 2018;103(1):74-88, Bademci et al. Hum Genet. 2018;137(6-7):479-486.                                                                                                                                                                                                          |
| <i>CDC14A</i>  | 603504 | <b>Deafness, autosomal recessive 105</b> , 616958, Autosomal recessive                                                                                                                                                                                                                                      |
| <i>BDP1</i>    | 607012 | Giroto et al., PLoS One. 2013;8(12):e80323.                                                                                                                                                                                                                                                                 |
| <i>SLC22A4</i> | 604190 | Ben Said et al., Hum Genet. 2016;135(5):513-24.                                                                                                                                                                                                                                                             |
| <i>PPIP5K2</i> | 611648 | Yousaf et al., PLoS Genet. 2018;14(3):e1007297.                                                                                                                                                                                                                                                             |
| <i>EPS8L2</i>  | 614988 | <b>Deafness autosomal recessive 106</b> , 617637, Autosomal recessive                                                                                                                                                                                                                                       |
| <i>WBP2</i>    | 606962 | <b>Deafness, autosomal recessive 107</b> , 617639, Autosomal recessive                                                                                                                                                                                                                                      |
| <i>ROR1</i>    | 602336 | ? <b>Deafness, autosomal recessive 108</b> , 617654, Autosomal recessive                                                                                                                                                                                                                                    |
| <i>ESRP1</i>   | 612959 | Rohacek et al., Dev Cell. 2017;43(3):318-331.                                                                                                                                                                                                                                                               |
| <i>NLRP3</i>   | 606416 | CINCA syndrome, 607115, Autosomal dominant; <b>Deafness, autosomal dominant 34</b> , with or without inflammation, 617772, Autosomal dominant; Familial cold-induced inflammatory syndrome 1, 120100, Autosomal dominant; Muckle-Wells syndrome, 191900, Autosomal dominant                                 |
| <i>CD164</i>   | 603356 | ? <b>Deafness, autosomal dominant 66</b> , 616969, Autosomal dominant                                                                                                                                                                                                                                       |
| <i>MCM2</i>    | 116945 | ? <b>Deafness, autosomal dominant 70</b> , 616968, Autosomal dominant                                                                                                                                                                                                                                       |
| <i>KITLG</i>   | 184745 | <b>Deafness, autosomal dominant 69</b> , unilateral or asymmetric, 616697, Autosomal dominant; Hyperpigmentation with or without hypopigmentation, 145250, Autosomal dominant; [Skin/hair/eye pigmentation 7, blond/brown hair], 611664                                                                     |
| <i>DMXL2</i>   | 612186 | ? <b>Deafness, autosomal dominant 71</b> , 617605, Autosomal dominant; ?Polyendocrine-polyneuropathy syndrome, 616113, Autosomal recessive                                                                                                                                                                  |
| <i>COL9A3</i>  | 120270 | Epiphyseal dysplasia, multiple, 3, with or without myopathy, 600969, Autosomal dominant; {Intervertebral disc disease, susceptibility to}, 603932                                                                                                                                                           |
| <i>HARS</i>    | 142810 | Charcot-Marie-Tooth disease, axonal, type 2W, 616625, Autosomal dominant; <b>Usher syndrome type 3B</b> , 614504, Autosomal recessive                                                                                                                                                                       |
| <i>ERAL1</i>   | 607435 | <b>Perrault syndrome 6</b> , 617565, Autosomal recessive                                                                                                                                                                                                                                                    |

**Table S3. Filtering process of whole-exome sequencing analysis.**

| <b>Individual</b>                                                     | <b>YUHL35 II-6</b>     | <b>YUHL41 III-2</b>    |
|-----------------------------------------------------------------------|------------------------|------------------------|
| Total sequence reads                                                  | 98,057,930             | 68,133,618             |
| Matched reads<br>(percentage of matched reads)                        | 95,992,778<br>(97.89%) | 67,823,755<br>(99.55%) |
| Total number of variants detected                                     | 205,883                | 179,169                |
| Variants which are not common in the<br>gnomAD (MAF>1%) (A)           | 2,374                  | 2,314                  |
| Variants filtered by 32 internal control data                         | 1,641                  | 1,602                  |
| Variants which are nonsynonymous or<br>located in splice junction (B) | 550                    | 580                    |
| % B / A                                                               | 23%                    | 25%                    |
| Located within splice site                                            | 39                     | 36                     |
| Deletion/Insertion                                                    | 11                     | 17                     |
| Stop codon gained / Stop codon lost                                   | 5                      | 11                     |
| Missense                                                              | 479                    | 488                    |
| Variants in 144 hearing loss known genes                              | 12                     | 9                      |
| Located within splice site                                            | 2                      | 2                      |
| Deletion/Insertion                                                    | 3                      | 1                      |
| Stop codon gained / Stop codon lost                                   | 0                      | 0                      |
| Missense                                                              | 7                      | 7                      |

**Table S4. Variants detected in YUHL35 II-6 in 144 monogenic genes linked to hearing loss**

| YUHL          | Gene symbol          | hg19                      | Accession #    | cDNA position | Amino acid substitution | Count | Coverage | Conservation |    |    |                                                                                                              | dbSNP150                                                                      | gnomAD MAF                 | NBK MAF      | Mutation Taster | PP2 Humvar | SIFT      | Condel  | CADD                                   | OMIM                                                                            | HGMD/ ClinVar                                        | Sanger confirmation                         |
|---------------|----------------------|---------------------------|----------------|---------------|-------------------------|-------|----------|--------------|----|----|--------------------------------------------------------------------------------------------------------------|-------------------------------------------------------------------------------|----------------------------|--------------|-----------------|------------|-----------|---------|----------------------------------------|---------------------------------------------------------------------------------|------------------------------------------------------|---------------------------------------------|
|               |                      |                           |                |               |                         |       |          | Mm           | Gg | Xt | Dr                                                                                                           |                                                                               |                            |              |                 |            |           |         |                                        |                                                                                 |                                                      |                                             |
| YUHL 35 II-6  | <b>KCNQ4</b>         | chr1:41285106_G/T         | NM_004700.3    | c.796G>T      | p.Asp266Tyr             | 45    | 87       | D            | E  | E  | D                                                                                                            | -                                                                             | ND                         | ND           | DC              | Dam        | Del       | Del     | 32                                     | Deafness, autosomal dominant 2A (AD)                                            | ND/ND                                                | Confirmed                                   |
|               | <b>San+V4:V13</b>    | chr1:103474068_C/G        | NM_001854.3    | c.1634G>C     | p.Gly545Ala             | 42    | 89       | G            | G  | A  | L                                                                                                            | -                                                                             | 0.00002031 (E.A=0.0002900) | ND           | Polymorphism    | Benign     | Tolerated | Neutral | 7.113                                  | Marshall syndrome (AD)/ Stickler syndrome, type II (AD)                         | ND/ND                                                | not performed                               |
|               | <b>DMXL2</b>         | chr15:51868351_T/A        | NM_001174116.1 | c.115A>T      | p.Ile39Phe              | 29    | 138      | I            | I  | I  | I                                                                                                            | rs929082641 A=0.0090/1132 (TOPMED)                                            | ND                         | ND           | DC              | Dam        | Del       | Del     | 31                                     | Deafness, autosomal dominant 71 (AD)                                            | ND/ND                                                | not confirmed                               |
|               |                      | chr15:51868354_C/A        |                | c.112G>T      | p.Val38Phe              | 28    | 133      | V            | V  | V  | V                                                                                                            | rs751988920 A=0.00003/3 (ExAC) A=0.0012/148 (TOPMED)                          | ND                         | ND           | DC              | Dam        | Del       | Del     | 32                                     |                                                                                 | ND/ND                                                | not confirmed                               |
|               |                      | chr15:51868381_A/-        |                | c.88-3del     | -                       | 26    | 26       |              |    |    |                                                                                                              | rs774907719 =-0.1974/2528 (ExAC) =-0.0188/2364 (TOPMED)                       | ND                         | ND           | -               | -          | -         | -       | 15.85                                  |                                                                                 | ND/ND                                                | Confirmed, but not segregated in the family |
|               | <b>TBC1D24</b>       | chr16:2550849_C/T         | NM_001199107.1 | c.1570C>T     | p.Arg524Trp             | 73    | 128      | R            | H  | Y  | H                                                                                                            | rs78644690 T=0.0003/32 (ExAC) T=0.00008/1 (GO-ESP) T=0.0004/56 (TOPMED)       | 0.0003134 (E.A=0.003987)   | T:0.0100756  | DC              | Benign     | Tolerated | Neutral | 23.4                                   | Deafness, autosomal recessive 86 (AR)/ Deafness, autosomal dominant 65 (AD)     | ND/ Reported (Likely benign)                         | not performed                               |
|               | <b>COL9A3</b>        | chr20:61455815_CCAGGTCC/- | NM_001853.3    | c.543_551del  | p.Pro185_Gly187del      | 9     | 30       |              |    |    |                                                                                                              | rs765392378 =-0.0005/24 (ExAC) =-0.0003/40 (TOPMED)                           | 0.0002316 (E.A=0.0002832)  | ND           | -               | -          | -         | -       | 22                                     | Epiphyseal dysplasia, multiple, 3, with or without myopathy (AD)                | ND/ND                                                | not confirmed                               |
|               | <b>USH2A</b>         | chr1:21641934_A/C         | NM_206933.2    | c.2802T>G     | p.Cys934Trp             | 62    | 134      | C            | C  | C  | C                                                                                                            | rs201527662 C=0.0002/26 (ExAC) C=0.0008/4 (1000 Genomes) C=0.0002/30 (TOPMED) | 0.0001915 (E.A=0.002441)   | C:0.00377834 | DC              | -          | -         | -       | 26.6                                   | Retinitis pigmentosa 39 / Usher syndrome, type 2A(AR)                           | Reported (CM114180)/ Reported (Conflicting interest) | not performed                               |
|               | <b>ADGRV1</b>        | chr5:89925321_G/A         | NM_032119.3    | c.1804G>A     | p.Ala602Thr             | 44    | 83       | A            | A  | A  | A                                                                                                            | rs201015784 A=0.0002/22 (ExAC) A=0.0004/2 (1000 Genomes) A=0.00004/5 (TOPMED) | 0.0001103 (E.A= 0.001510)  | A:0.00881612 | DC              | Dam        | Tolerated | Del     | 25.5                                   | Usher syndrome, type 2C (AR)/ Usher syndrome, type 2C, GPR98/PDZD7 digenic (AR) | ND/ND                                                | not performed                               |
|               | <b>TMIE</b>          | chr3:46751074_AAG/-       | NM_147196.2    | c.391_393del  | p.Lys131del             | 17    | 43       |              |    |    |                                                                                                              | rs10578999 AAG=0.2640/1303 (1000 Genomes) AAG=0.2407/30224 (TOPMED)           | 0.006457 (E.A=0.0006393)   | ND           | -               | -          | -         | -       | 13.71                                  | Deafness, autosomal recessive 6 (AR)                                            | ND/ Reporeted (Conflicting interest)                 | not performed                               |
| <b>CLIC5</b>  | chr6:45922867_G/A    | NM_001114086.1            | c.650+5C>T     | -             | 96                      | 164   |          |              |    |    | rs755109540 A=0.00005/6 (ExAC) A=0.00002/2 (TOPMED)                                                          | 0.00006155 (S.A=0.0004887)                                                    | -                          | -            | -               | -          | -         | 4.971   | Deafness, autosomal recessive 103 (AR) | ND/ND                                                                           | not performed                                        |                                             |
| <b>TRIOBP</b> | chr22:38120176_CCT/- | NM_001039141.2            | c.1617_1619del | p.Ser540del   | 39                      | 125   |          |              |    |    | rs36219868 =-0.3074/36647 (ExAC) =-0.2504/1254 (1000 Genomes) =-0.2788/3273 (GO-ESP) =-0.1959/24596 (TOPMED) | 0.08830 (E.A=0.2308)                                                          | ND                         | -            | -               | -          | -         | 12.65   | Deafness, autosomal recessive 28 (AR)  | ND/ND                                                                           | not performed                                        |                                             |

Abbreviations are as follows: CADD, Combined Annotation Dependent Depletion; Condel, CONsensus DELeteriousness score of non-synonymous single nucleotide variants; Dam, damaging; DC, disease causing; Del, deleterious; E.A, East Asian; HGMD, Human Gene Mutation Database; MAF, minor allele frequency; ND, no data ; OMIM, Online Mendelian Inheritance in Man; PD, probably damaging; PP2, PolyPhen-2 prediction score Humvar; PROVEAN, Protein Variation Effect Analyzer; S.A, South Asian; SIFT, Sorting Intolerant from Tolerant; SNP, single nucleotide polymorphism; YUHL, Yonsei University Hearing Loss cohort. dbSNP database (<http://www.ncbi.nlm.nih.gov/SNP>). genome Aggregation Database browser (<http://gnomad.broadinstitute.org/>). iNational Biobank of Korea (NBK), Centers for Disease Control and Prevention. Mutation taster (MT) (<http://www.mutationtaster.org/>). PolyPhen-2 (PP2) prediction score HumVar ranges from 0 to 1.0; 0 = benign, 1.0 = probably damaging (<http://genetics.bwh.harvard.edu/pph2/>). SIFT (<http://sift.jcvi.org/>). Condel (<http://bbglab.irbbarcelona.org/fannsdb/>). CADD (<https://cadd.gs.washington.edu/>). OMIM (<https://www.omim.org/>). HGMD (<http://www.hgmd.cf.ac.uk/ac/index.php>). ClinVar (<https://www.ncbi.nlm.nih.gov/clinvar/>).

# YUHL35, II-6 (F/40 yr)

## Right ear

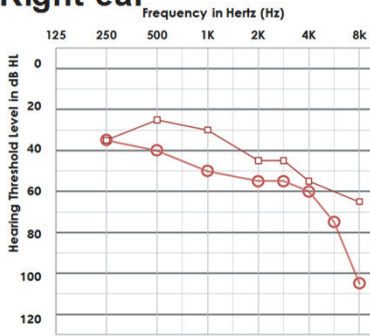

○ Right ear  
□ Right ear, 8 years ago

## Left ear

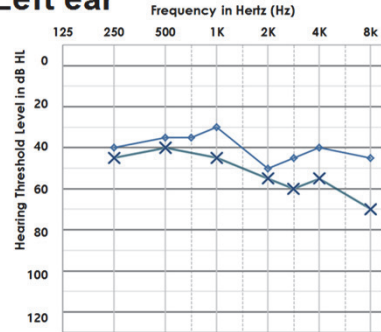

× Left ear  
◇ Left ear, 8 years ago

**Figure S1. Long term follow-up of pure-tone audiograms in YUHL35.**

Hearing thresholds in II-6 were followed-up for 8 years, after which hearing function became worse bilaterally, indicating slow progression of hearing loss.

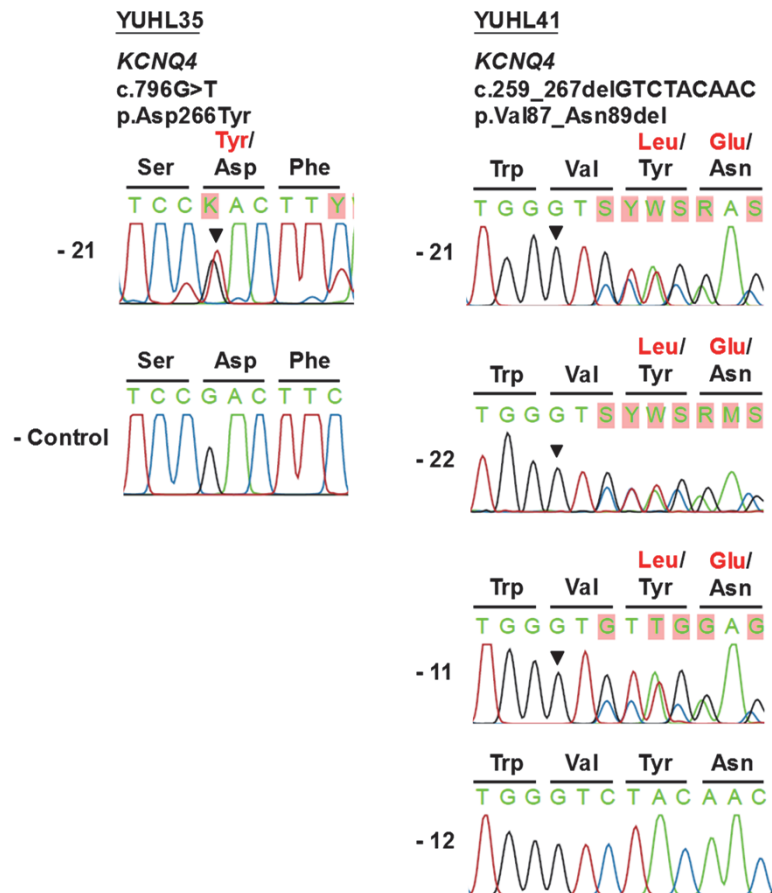

**Figure S2. Sequencing traces of mutations detected in KCNQ4.** Families are listed in the same order as in Table 1. Family numbers (underlined), mutated genes, altered nucleotides, and amino-acid changes are given above sequence traces. Wild-type control sequences are shown below mutated sequences. Codon triplets are underlined to indicate the reading frame. Mutated nucleotides are denoted by arrowheads.

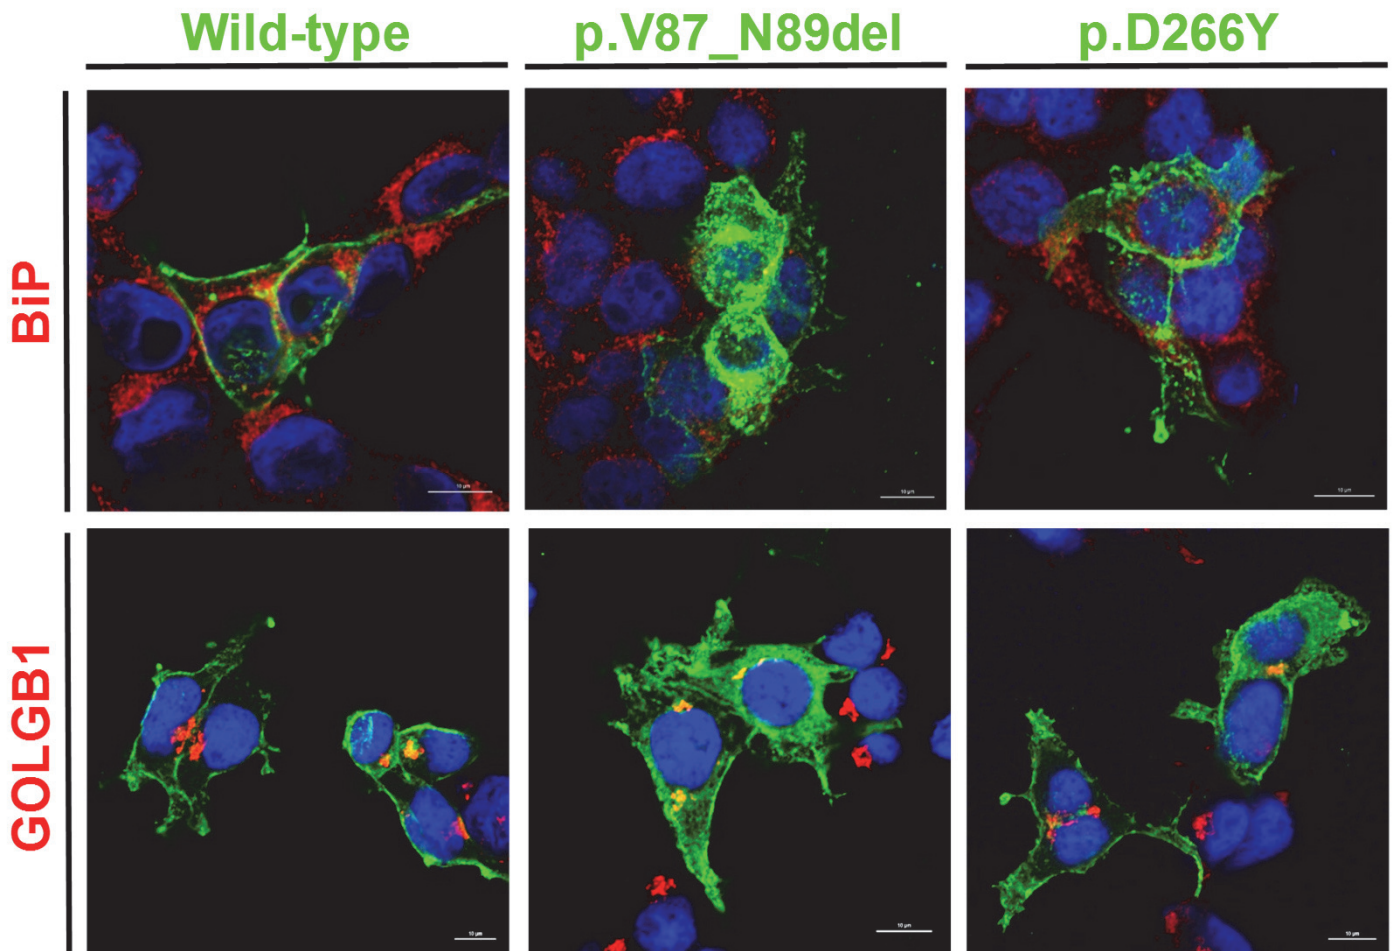

**Figure S3. Immunofluorescence of wild-type and mutant KCNQ4 proteins in HEK293T cells.**

HEK293T were transfected with N-terminally Myc-tagged wild-type (WT) and mutant KCNQ4 clones. Cells were immunostained with anti-Myc, anti-BiP, and anti-GOLGB1 antibodies. Nuclei were stained with DAPI. BiP and GOLGB1 are markers for the endoplasmic reticulum and Golgi apparatus, respectively. Both mutant KCNQ4 proteins and WT protein were observed on the plasma membrane.

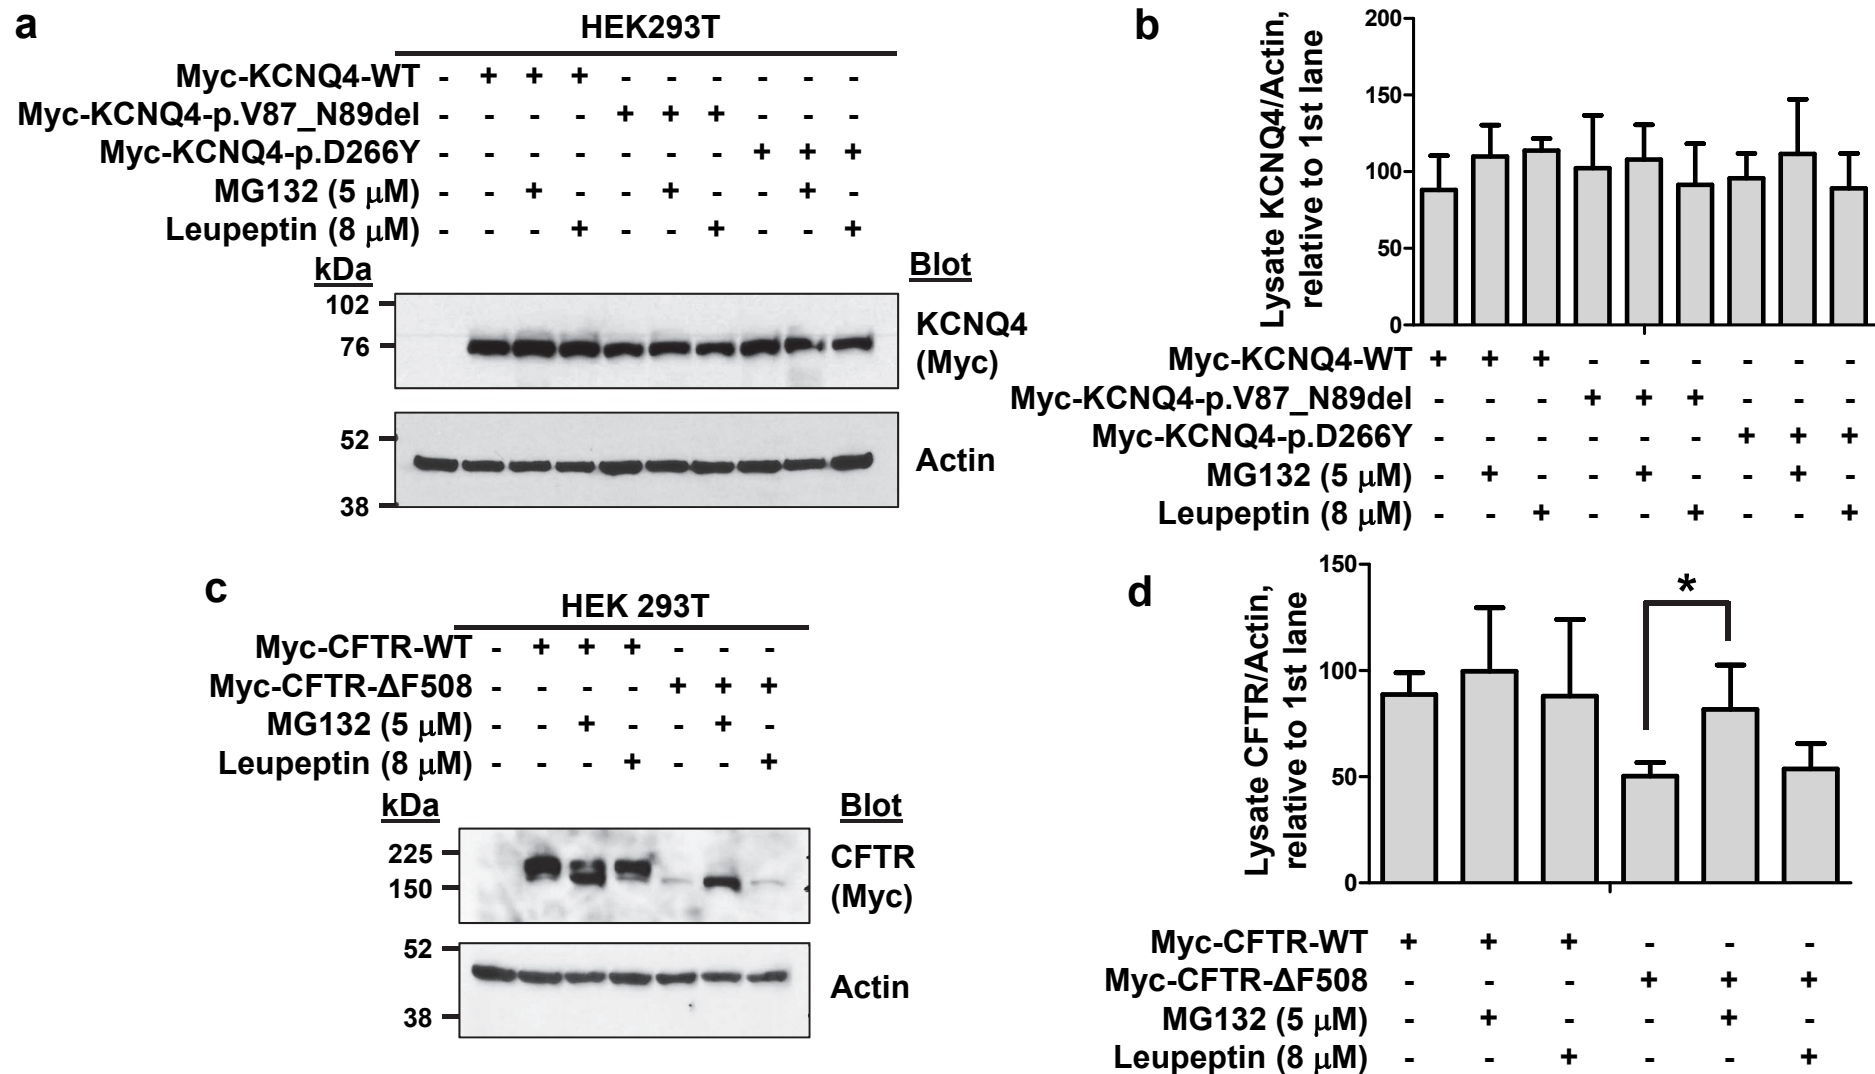

**Figure S4. Effect of proteasome or lysosome inhibition on expression of KCNQ4 and CFTR.** HEK293T cells were transfected with Myc-tagged KCNQ4 or CFTR wild-type (WT) mutant plasmids. Cells were treated with proteasomal inhibitor MG132 or lysosomal inhibitor leupeptin for 24 hr. **(a, b)** Effect of MG132 or leupeptin on expression of WT-, p.V87\_N89del-, and p.D266Y-KCNQ4. The blot (b) is representative of three experiments and band intensity (b) was quantified as mean + SD of three experiments. Note that the expression level of either p.V98\_N89del or p.D266Y KCNQ4 was not affected by MG132 or leupeptin treatment. **(c, d)** Effect of MG132 or leupeptin on expression of WT- and  $\Delta$ F508-CFTR. The blot (c) is representative of three experiments and band intensity (d) was quantified as mean + SD of three experiments. Note that trafficking defective mutant,  $\Delta$ F508-CFTR, was significantly increased by MG132 treatment. \* P < 0.05, t-test.

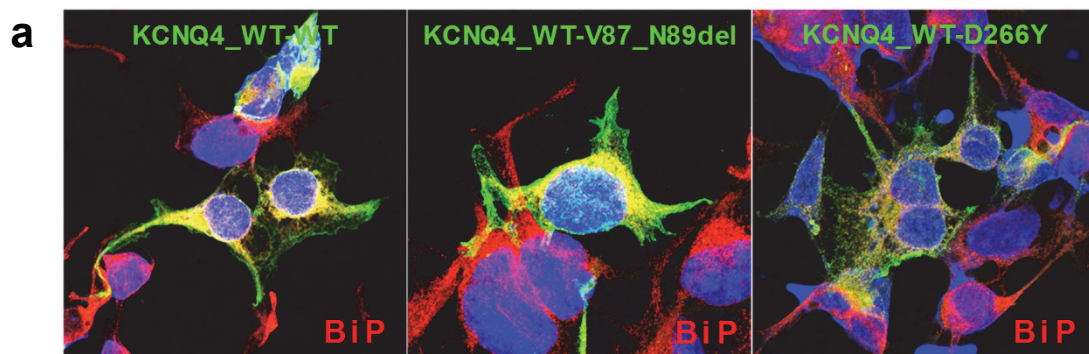

**b**

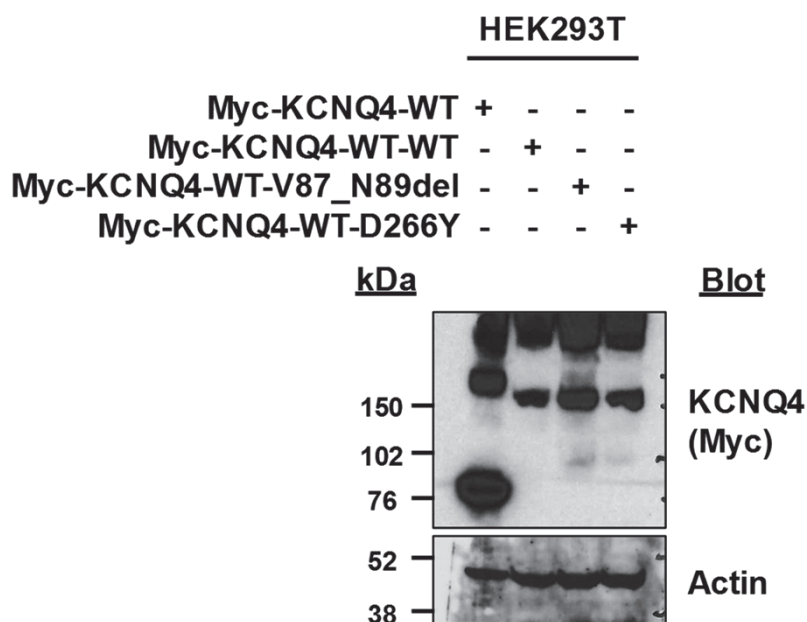

**Figure S5. Expression of tandem concatamers of wild-type and mutant KCNQ4.**

HEK293T cells were transfected with Myc-tagged KCNQ4 wild-type (WT)-WT and WT-mutant plasmids. **(a)** Immunofluorescence of tandem concatamers of KCNQ4 with an endoplasmic reticulum marker, BiP. **(b)** Immunoblotting of tandem concatamers. Cell lysates were blotted with anti-Myc antibodies, and 10 or 50 mg protein was loaded into each lane for KCNQ4-WT monomer and concatamers, respectively.



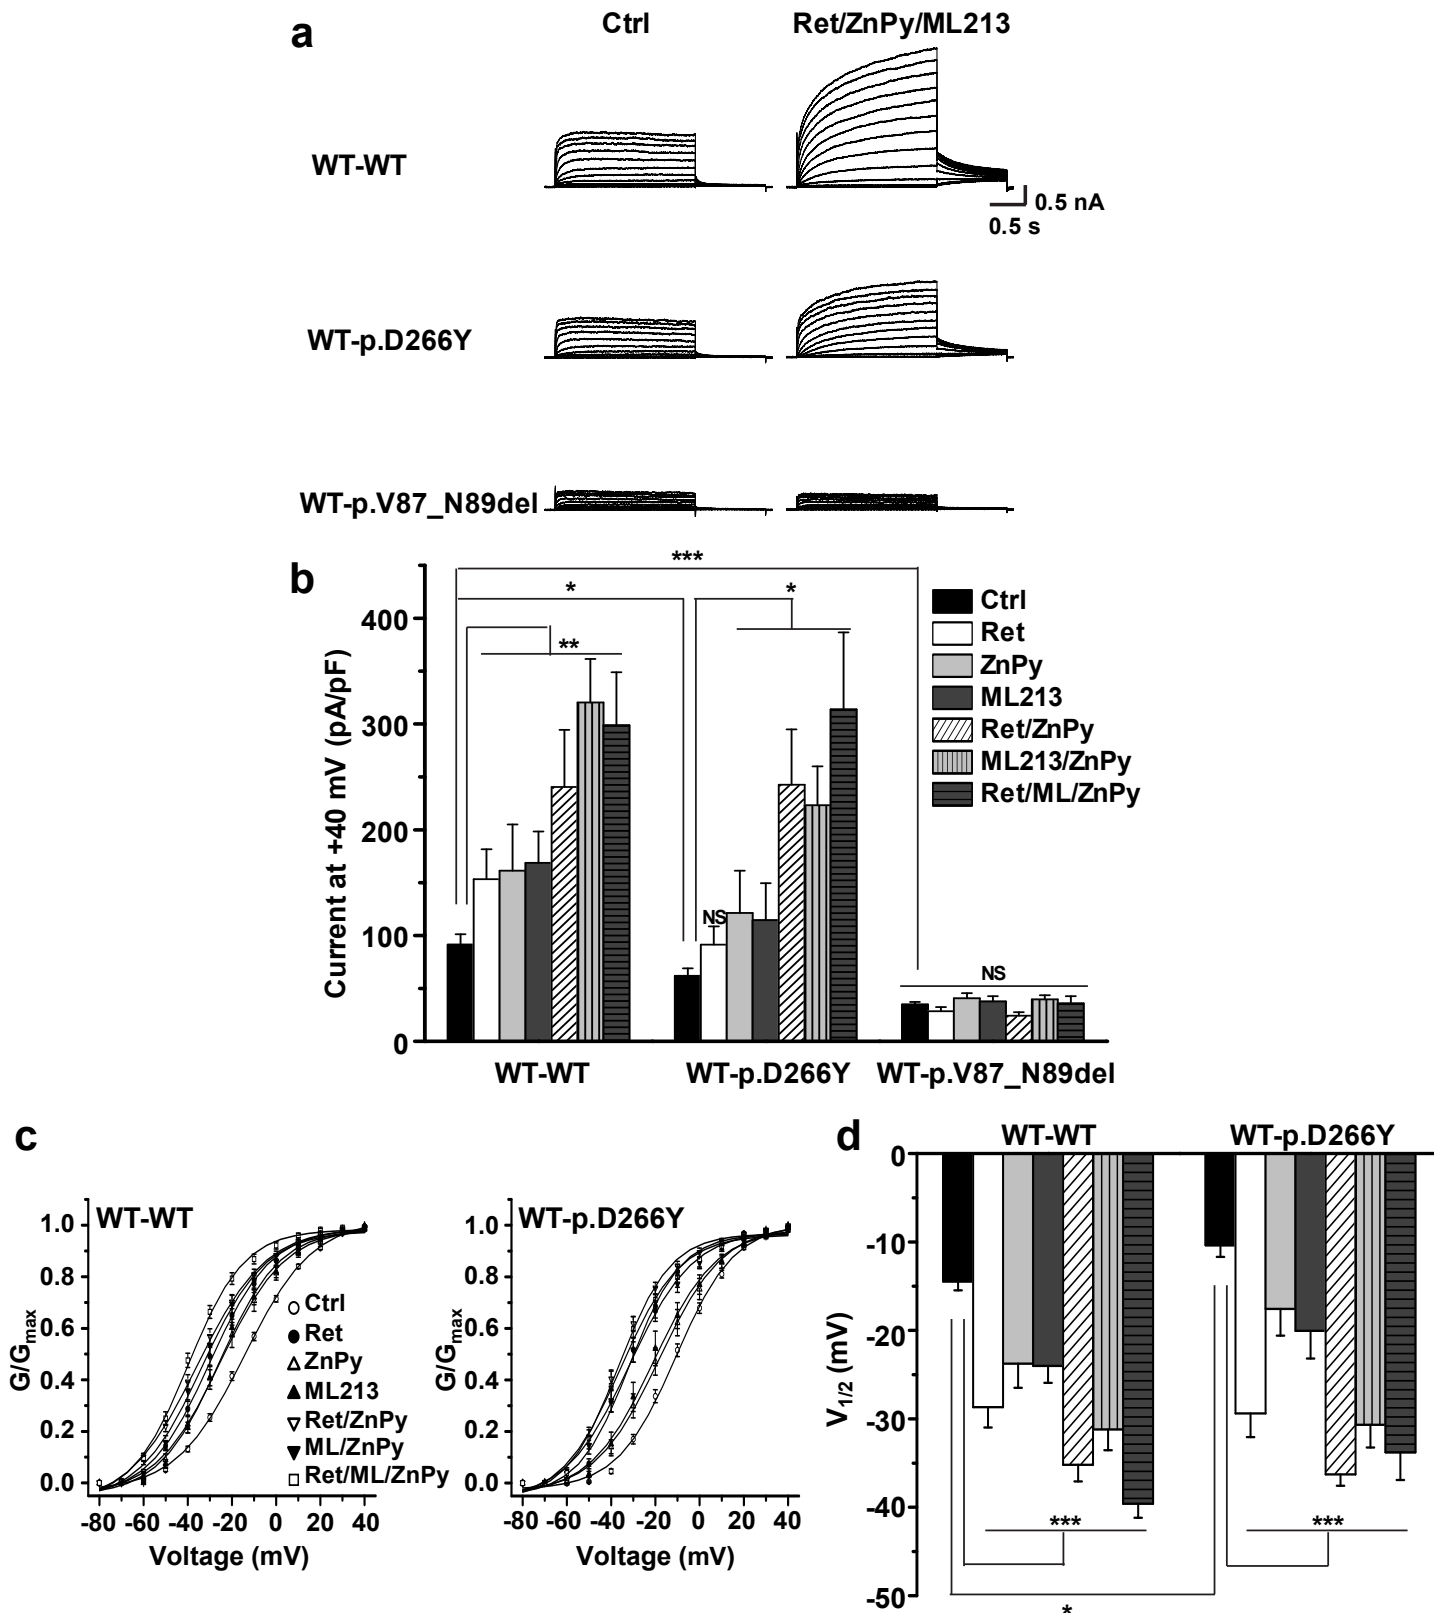

**Figure S6. Effects of KCNQ openers on KCNQ4 channels assembled from tandem concatamers.**

(a) Effects of combination treatment with KCNQ openers (10  $\mu$ M Ret, 10  $\mu$ M ZnPy, and 3  $\mu$ M ML213) on the K<sup>+</sup> current from WT-WT, WT-p.D266Y, and WT-p.V87\_N89del concatamers. (b) Bar graphs showing the degree of K<sup>+</sup> current increases by single or combination treatment with KCNQ openers. WT-WT, n = 65; WT-p.D266Y, n = 51; WT-p.V87\_N89del, n = 46. (c, d) Effects of KCNQ openers on the activation curves (c) and half-activation voltages ( $V_{1/2}$ , d) of WT-WT and WT-p.D266Y concatamers are shown. \*,  $p < 0.05$ ; \*\*,  $p < 0.01$ ; \*\*\*,  $p < 0.005$  versus the indicated groups.

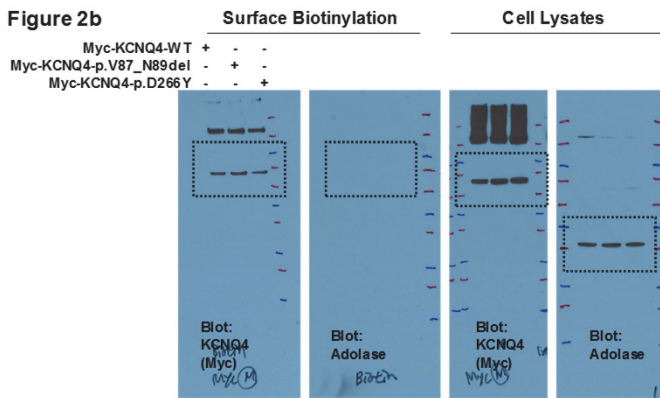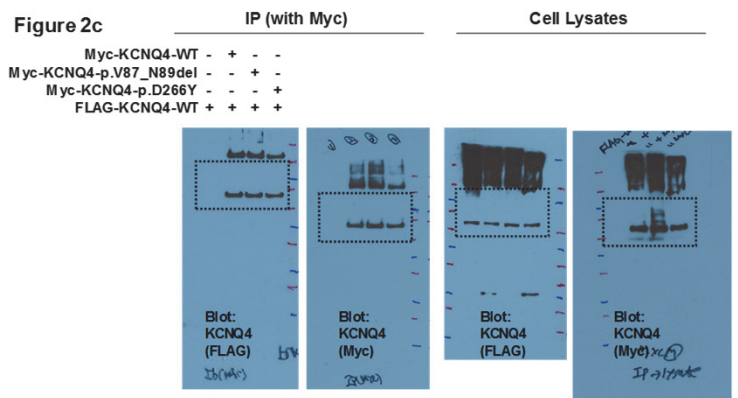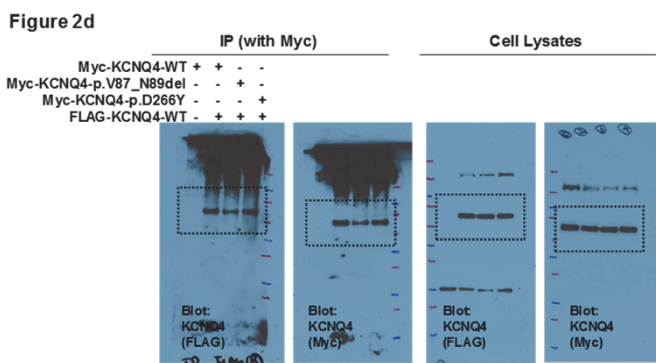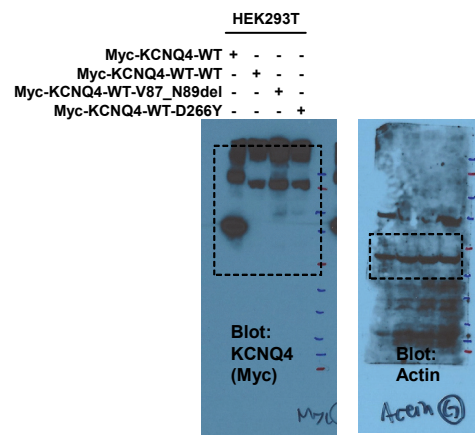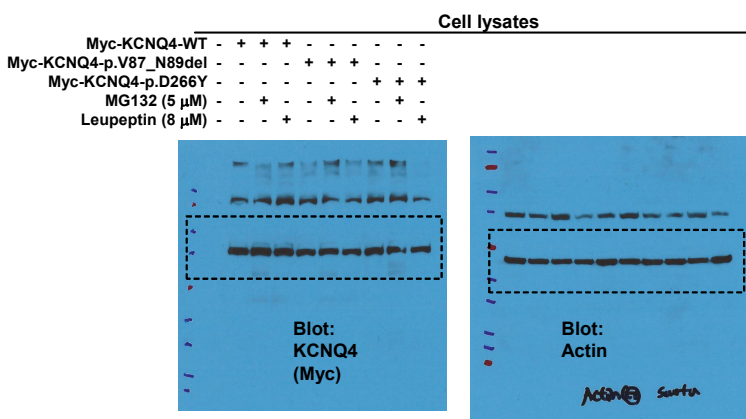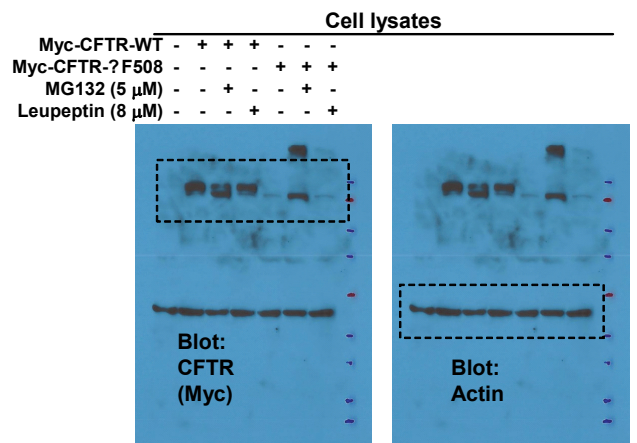

**Figure S7. Uncropped images of western blot data**
